# Supplementary material for: Severity and Etiology of Incident Stroke in Patients Screened for Atrial Fibrillation vs Usual Care and the Impact of Prior Stroke: A Post Hoc Analysis of the LOOP Randomized Clinical Trial
Source: PubMed Central journal article supplement (PMC9425290; doi:10.1001/jamaneurol.2022.3031), 2022-08-29
Supplement: jamaneurol-e223031-s003.pdf [file jamaneurol-e223031-s003.pdf]

## Data Sharing Statement

Diederichsen. Severity and Etiology of Incident Stroke in Patients Screened for Atrial Fibrillation vs Usual Care and the Impact of Prior Stroke. *JAMA Neurol.* Published August 29, 2022. doi:10.1001/jamaneurol.2022.3031

### Data

**Data available:** Yes

**Data types:** Deidentified participant data

**How to access data:** The data will be part of a consortium within AFFECT-EU and afscreen.org

**When available:** beginning date: 01-01-2023

### Supporting Documents

**Document types:** None

### Additional Information

**Who can access the data:** Data will be available to researchers in the consortium, fulfilling legal requirements. Protocol and Informed consent forms can be accessed via the primary publication in Lancet ([https://www.thelancet.com/journals/lancet/article/PIIS0140-6736\(21\)01698-6/ppt](https://www.thelancet.com/journals/lancet/article/PIIS0140-6736(21)01698-6/ppt))

**Types of analyses:** Data, Protocol and Informed consent forms

**Mechanisms of data availability:** Without investigator support
